# Supplementary material for: A Co-based single-molecule magnet confined in a barium phosphate apatite matrix with a high energy barrier for magnetization relaxation
Source: Royal Society of Chemistry journal article supplement (doi:10.1039/c7cc02453c), 2017-01-01
Supplement: c7cc02453c1.pdf [file c7cc02453c1.pdf]

## Supplementary information

### Experimental details

Samples with nominal composition  $\text{Ba}_{10}(\text{PO}_4)_6(\text{Co}_x\text{OH}_{1-2x})_2$ ,  $x = 0.05$  (**1**), 0.3 (**2**, **2a**), and 0.5 (**3**) were prepared as follows. Stoichiometric quantities of  $\text{BaCO}_3$ ,  $(\text{NH}_4)_2\text{HPO}_4$ , and  $\text{Co}_3\text{O}_4$  with 2% excess of  $\text{BaCO}_3$  were grinded and mixed in an agate mortar (of a total mass of 5 g approx.). The powder was heated to 400 °C for 0.5 h, annealed at this temperature for 0.5 h, heated to 600°C for 0.5 h, annealed at this temperature for 0.5 h, heated to 800°C for 0.5 h, annealed at this temperature for 2.5 h. The furnace cooled powder was grinded and annealed at 1150°C for 4 h. The precursor was grinded, pressed in pellets, annealed at 1300°C for 4 h, and air quenched. The last procedure was repeated once more. The resulting pellets were annealed at 1400°C or 1450°C for 1 – 2 hours and air quenched. All procedures were performed in air atmosphere.

Synchrotron powder X-ray diffraction was carried out at the Diamond Light Source, I12-JEEP beamline<sup>1</sup> ( $\lambda = 0.23369$  Å) using 2D area flat panel detector Pixium RF4343. Wavelength calibration and data reduction was performed using the software DAWN.<sup>2,3</sup> High-precision powder X-ray diffraction was conducted using a D8 Bruker-AXS powder diffractometer (Cu-K $\alpha$ 1 radiation from a primary Ge(111) Johansson-type monochromator; Lynx-Eye position-sensitive detector with an opening angle of 3.5°) in Bragg-Brentano geometry in the  $2\theta$  range 10 – 120°, step 0.009°. The crystal structures were refined with the JANA 2006 computer program.<sup>4</sup>

Scanning electron microscopy with energy-dispersive X-ray (EDX) analysis was performed on a Supra 50 VP LEO electron microscope.

Magnetic properties were measured on a Quantum Design SQUID VSM (**I**) and on a Quantum Design SQUID MPMS (**II**) in the temperature range 1.8 – 300 K and magnetic field range -70 – +70 kOe. A piece of a ceramic sample (50 - 200 mg) was fixed with GE-varnish (< 0.3 mg) on a quartz rod (**I**) or deposited into a gelatin capsule in a plastic straw (**II**). dc-magnetization was measured in a dc-SQUID mode. Magnetization decay was registered for 2 hour. ac susceptibility ( $\chi_{ac}$ ) was measured under an ac field of 2.5 – 3 Oe in the frequency range 0.1 – 945 Hz (**I**) or 0.1 – 1420 Hz (**II**) and in the temperature range 1.8 – 50 K. The data were corrected for the diamagnetism of a gelatin capsule if necessary. The core diamagnetism was subtracted from the magnetization using Pascal's constants. The generalized Debye model was applied to fit simultaneously the  $\chi'$  and  $\chi''$  components of  $\chi_{ac}(\omega)$  ( $\omega = 2\pi f$ ) using the following equations<sup>5</sup>

$$\chi'(\omega) = \chi_s + \frac{(\chi_0 - \chi_s) \left[ 1 + (\omega\tau)^{-\alpha} \sin 1/2\alpha\pi \right]}{1 + 2(\omega\tau)^{1-\alpha} \sin 1/2\alpha\pi + (\omega\tau)^{2(1-\alpha)}}$$

$$\chi''(\omega) = \frac{(\chi_0 - \chi_s)(\omega\tau)^{1-\alpha} \cos 1/2\alpha\pi}{1 + 2(\omega\tau)^{1-\alpha} \sin 1/2\alpha\pi + (\omega\tau)^{2(1-\alpha)}}$$

Relaxation time  $\tau$ , low- and high-frequency susceptibilities  $\chi_0$  and  $\chi_s$ , their difference  $\Delta\chi = F$  (as a contribution of slow-relaxing magnetization), and a relaxation time distribution parameter  $\alpha$  were estimated. All the parameters were refined simultaneously for the temperature interval 15 – 35 K, for which a  $\chi''(\omega)$  local maximum is observed. Then  $\Delta\chi(T)$  was fitted by Curie-Weiss equation. In order to escape correlations, for higher temperatures,  $\Delta\chi$  was fixed to the value calculated using the Curie-Weiss parameters, while all other parameters were refined.

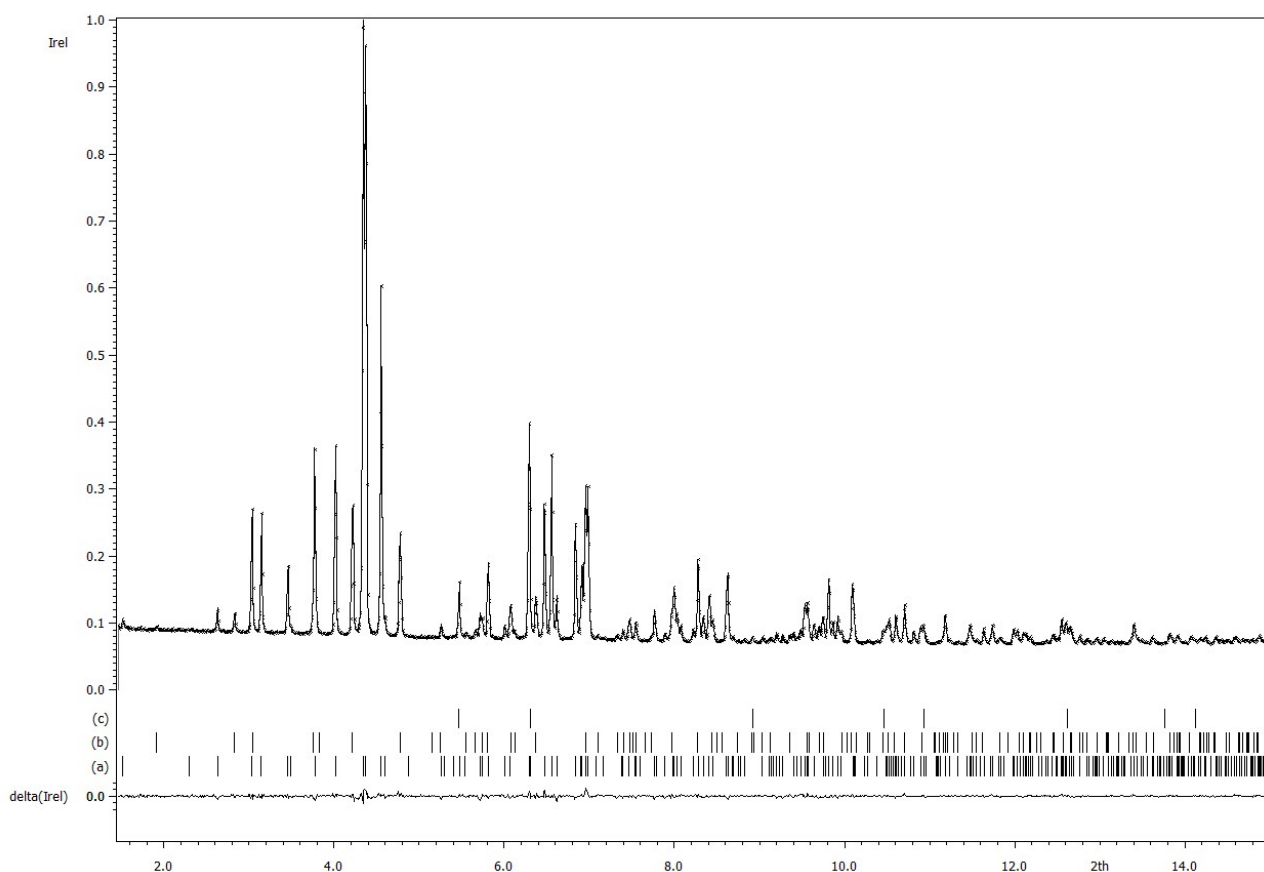

Figure S1. Synchrotron powder X-ray diffraction pattern of **3**. Observed (crosses), calculated (solid line) and difference (solid line below) plots. Positions of Bragg reflections are shown as strokes underneath: (a) the main apatite-type phase  $\text{Ba}_{10}(\text{PO}_4)_6(\text{Co}_{0.33}\text{O}_{0.72}\text{H}_y)_2$ , (b)  $\text{Ba}_3(\text{PO}_4)_2$  (12.8%), and (c)  $\text{CoO}$  (1.4%).

Table S1. Crystal structure refinement data for  $\text{Ba}_{10}(\text{PO}_4)_6(\text{Co}_{0.33}\text{O}_{0.72}\text{H}_y)_2$  (sample **3**).

|                                                                     |                        |
|---------------------------------------------------------------------|------------------------|
| Temperature (K)                                                     | 293 K                  |
| Wavelength (Å)                                                      | 0.23369                |
| Space group                                                         | $\text{P6}_3/\text{m}$ |
| $a$ (Å)                                                             | 10.1926(1)             |
| $c$ (Å)                                                             | 7.7532(1)              |
| $V$ (Å <sup>3</sup> )                                               | 697.56(2)              |
| $Z$                                                                 | 1                      |
| $2\theta$ range (deg.)                                              | 1.47 - 15              |
| $R_{\text{wp}}$                                                     | 0.014                  |
| $R_{\text{all}}$                                                    | 0.023                  |
| $\Delta F_{\text{max}}, \Delta F_{\text{min}}$ (e Å <sup>-3</sup> ) | 0.66, -0.63            |

Table S2. Atomic parameters and thermal displacement parameters ( $\text{\AA}^2$ ) for  $\text{Ba}_{10}(\text{PO}_4)_6(\text{Co}_{0.33}\text{O}_{0.72}\text{H}_y)_2$  (sample **3**).

| Atom                            | Ba(1)      | Ba(2)       | P         | O(1) <sup>a)</sup> | O(2)       | O(3)      | O(4)     | Co <sup>b)</sup> |
|---------------------------------|------------|-------------|-----------|--------------------|------------|-----------|----------|------------------|
| Site                            | 4f         | 6h          | 6h        | 6h                 | 6h         | 12i       | 4e       | 12i              |
| SOF                             | 1          | 1           | 1         | 1                  | 1          | 1         | 0.36(2)  | 0.055(2)         |
| <i>x</i>                        | 1/3        | 0.24375(17) | 0.3996(6) | 0.3440(14)         | 0.5560(14) | 0.3537(7) | 0        | 0.033(6)         |
| <i>y</i>                        | 2/3        | 0.98102(18) | 0.3626(7) | 0.4748(13)         | 0.4441(13) | 0.2732(8) | 0        | 0                |
| <i>z</i>                        | -0.0006(4) | 1/4         | 1/4       | 1/4                | 1/4        | 0.0894(8) | 0.204(5) | 0                |
| $U_{\text{eq}}, U_{\text{iso}}$ | 0.0261(5)  | 0.0208(10)  | 0.016(2)  | 0.028(2)           | 0.028(2)   | 0.028(2)  | 0.028(2) | 0.07(2)          |
| $U_{11}$                        | 0.0266(7)  | 0.0330(14)  |           |                    |            |           |          |                  |
| $U_{22}$                        | 0.0266(7)  | 0.0222(12)  |           |                    |            |           |          |                  |
| $U_{33}$                        | 0.0250(10) | 0.0321(9)   |           |                    |            |           |          |                  |
| $U_{12}$                        | 0.0133(3)  | 0.0101(13)  |           |                    |            |           |          |                  |
| $U_{13}$                        | 0          | 0           |           |                    |            |           |          |                  |
| $U_{23}$                        | 0          | 0           |           |                    |            |           |          |                  |

<sup>a)</sup>An overall  $U_{\text{iso}}$  value for all oxygen atoms was refined.

<sup>b)</sup>Initially obtained large  $U_{11}$  and  $U_{22}$  of 0.15 for Co atom in comparison with  $U_{33} = 0.03$  suggested the Co atom to disorder mostly in *ab*-plain. As it was not possible to get a proper displacement direction due to strong correlations, *y* and *z* of the Co atom were fixed to zero values.

Table S3. Selected interatomic distances ( $\text{\AA}$ ) and angles (degrees) in the crystal structure of  $\text{Ba}_{10}(\text{PO}_4)_6(\text{Co}_{0.33}\text{O}_{0.72}\text{H}_y)_2$  (sample **3**).

|            |           |    |              |          |    |
|------------|-----------|----|--------------|----------|----|
| Ba(1)-O(1) | 2.797(11) | 3x | Co-O(4)      | 1.62(5)  |    |
| Ba(1)-O(2) | 2.759(12) | 3x | Co-O(3)      | 3.03(6)  |    |
| Ba(1)-O(3) | 3.011(8)  | 3x | O(1)-P-O(2)  | 107.6(9) |    |
| Ba(2)-O(1) | 2.913(4)  |    | O(1)-P-O(3)  | 110.2(5) | 2x |
| Ba(2)-O(2) | 2.768(9)  |    | O(2)-P-O(3)  | 106.6(5) | 2x |
| Ba(2)-O(3) | 2.756(4)  | 2x | O(3)-P-O(3)  | 115.3(6) |    |
| Ba(2)-O(3) | 2.888(4)  | 2x | O(4)-Co-O(4) | 156(4)   |    |
| Ba(2)-O(4) | 2.611(4)  |    |              |          |    |
| P-O(1)     | 1.509(18) |    |              |          |    |
| P-O(2)     | 1.380(14) |    |              |          |    |
| P-O(3)     | 1.474(7)  | 2x |              |          |    |

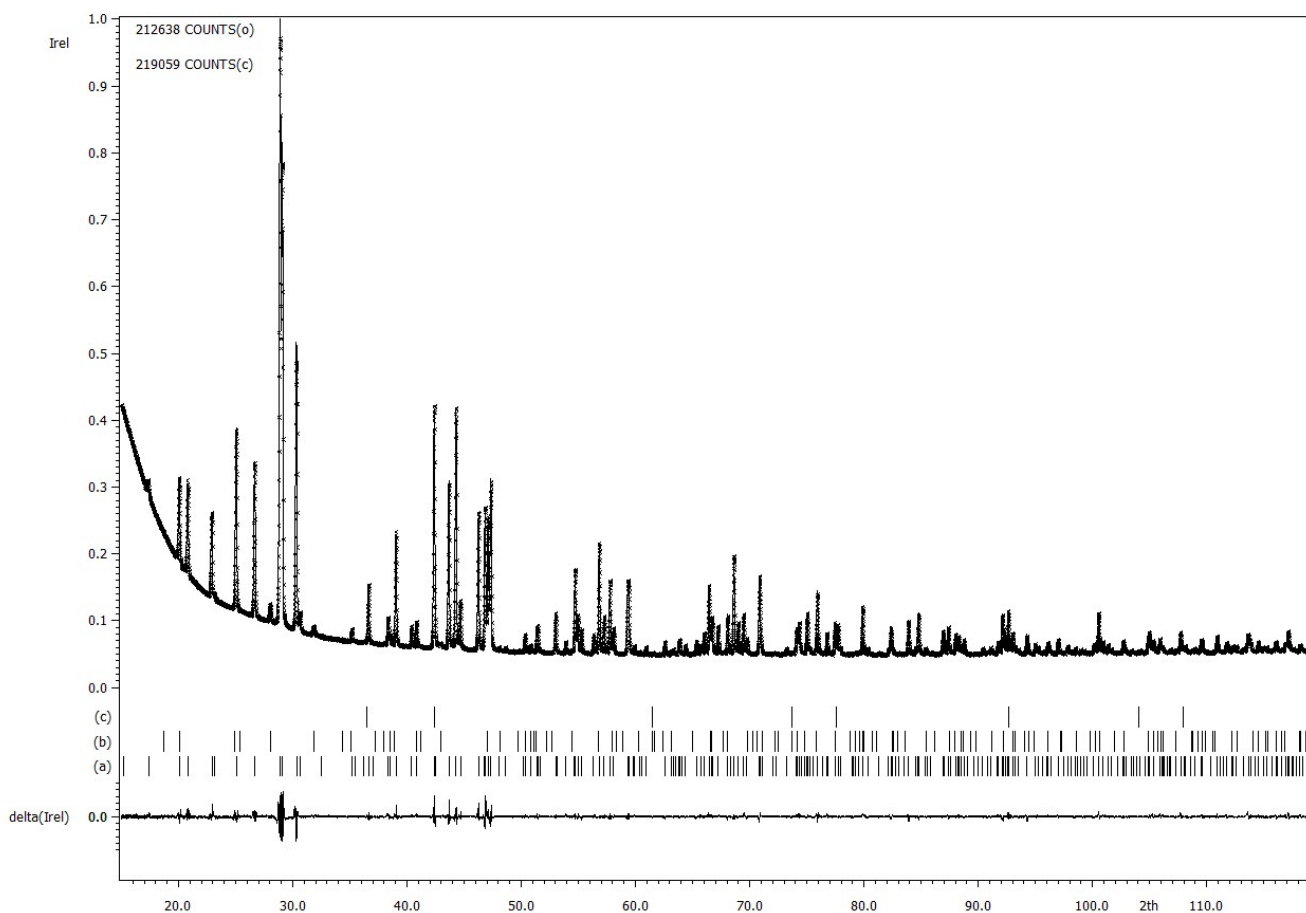

Figure S2. Powder X-ray diffraction pattern of **2**. Observed (crosses), calculated (solid line) and difference (solid line below) plots. Positions of Bragg reflections are shown as strokes underneath: (a) the main apatite-type phase  $\text{Ba}_{10}(\text{PO}_4)_6(\text{Co}_{0.23}\text{O}_{0.88}\text{H}_y)_2$ , (b)  $\text{Ba}_3(\text{PO}_4)_2$  (2.18%), and (c)  $\text{CoO}$  (0.33%). Apatite-type phase lattice: Space group  $\text{P6}_3/\text{m}$ ,  $a = 10.1962(2) \text{ \AA}$ ,  $c = 7.7486(2) \text{ \AA}$ .

Table S4. Atomic parameters and thermal displacement parameters ( $\text{\AA}^2$ ) for  $\text{Ba}_{10}(\text{PO}_4)_6(\text{Co}_{0.23}\text{O}_{0.88}\text{H}_y)_2$  (sample **2**).  $R_{\text{wp}} = 0.019$ ,  $R_{\text{all}} = 0.021$ .

| Atom                               | Ba(1)      | Ba(2)       | P         | O(1)       | O(2)       | O(3)       | O(4)     | Co        |
|------------------------------------|------------|-------------|-----------|------------|------------|------------|----------|-----------|
| Site                               | 4f         | 6h          | 6h        | 6h         | 6h         | 12i        | 4e       | 2b        |
| SOF                                | 1          | 1           | 1         | 1          | 1          | 1          | 0.44(3)  | 0.228(11) |
| $x$                                | 1/3        | 0.24379(15) | 0.4028(6) | 0.3398(13) | 0.5787(13) | 0.3443(8)  | 0        | 0         |
| $y$                                | 2/3        | 0.98083(15) | 0.3702(6) | 0.4840(12) | 0.4538(12) | 0.2627(10) | 0        | 0         |
| $z$                                | -0.0005(3) | 1/4         | 1/4       | 1/4        | 1/4        | 0.0894(7)  | 0.199(6) | 0         |
| $U_{\text{eq}}$ , $U_{\text{iso}}$ | 0.0165(8)  | 0.0182(10)  | 0.015(2)  | 0.018(4)   | 0.008(3)   | 0.025(3)   | 0.11(2)  | 0.023(9)  |
| $U_{11}$                           | 0.0178(10) | 0.0225(14)  |           |            |            |            |          | 0.035(12) |
| $U_{22}$                           | 0.0178(10) | 0.0089(12)  |           |            |            |            |          | 0.035(12) |
| $U_{33}$                           | 0.0139(11) | 0.0201(11)  |           |            |            |            |          | 0.001(13) |
| $U_{12}$                           | 0.0089(5)  | 0.0056(11)  |           |            |            |            |          | 0.017(6)  |
| $U_{13}$                           | 0          | 0           |           |            |            |            |          | 0         |
| $U_{23}$                           | 0          | 0           |           |            |            |            |          | 0         |

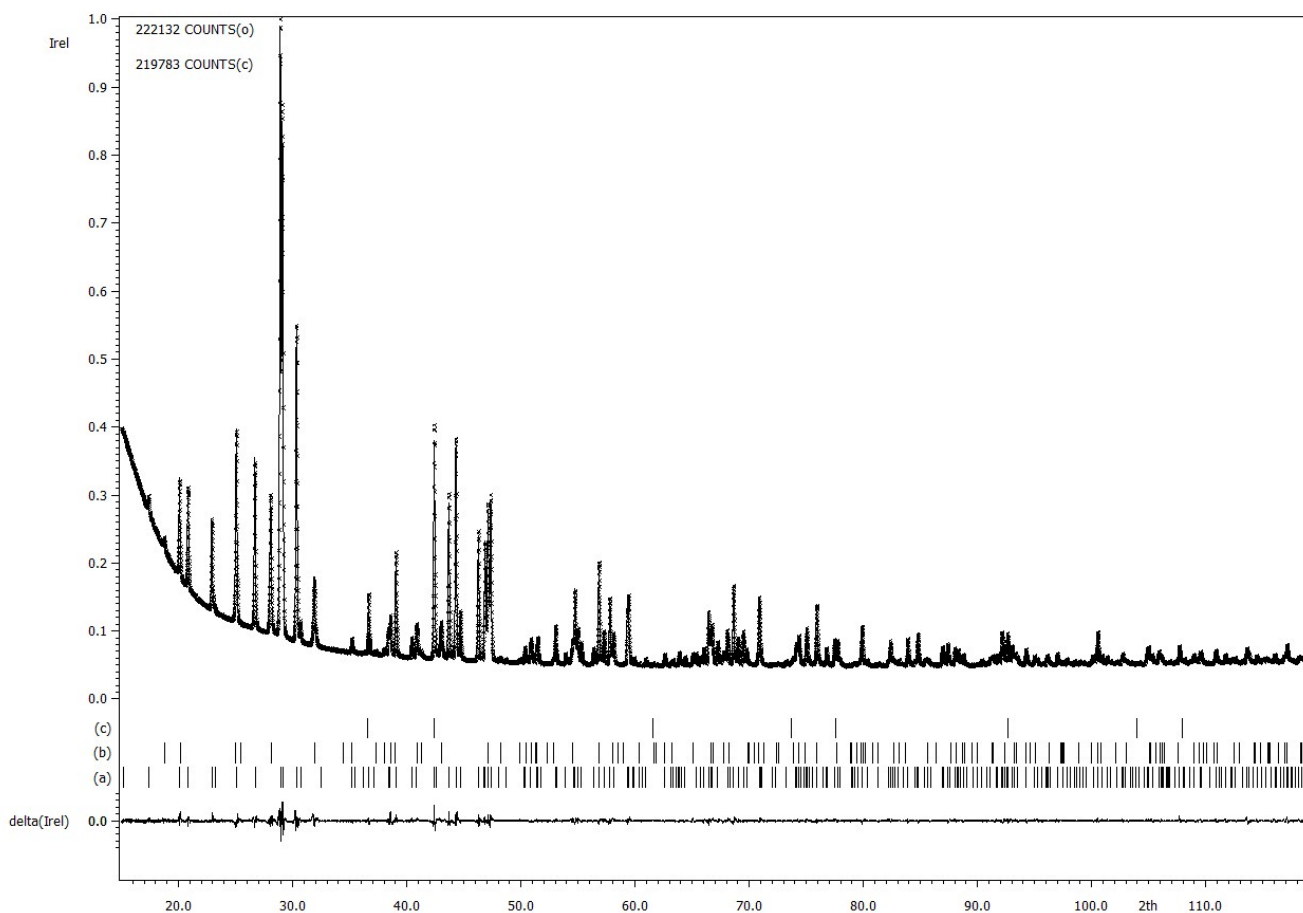

Figure S3. Powder X-ray diffraction pattern of **2a**. Observed (crosses), calculated (solid line) and difference (solid line below) plots. Positions of Bragg reflections are shown as strokes underneath: (a) the main apatite-type phase  $\text{Ba}_{10}(\text{PO}_4)_6(\text{Co}_{0.23}\text{O}_{0.98}\text{H}_y)_2$ , (b)  $\text{Ba}_3(\text{PO}_4)_2$  (14.4%), and (c)  $\text{CoO}$  (0.37%). Apatite-type phase lattice: Space group  $\text{P6}_3/\text{m}$ ,  $a = 10.1983(2) \text{ \AA}$ ,  $c = 7.7508(2) \text{ \AA}$ .

Table S5. Atomic parameters and thermal displacement parameters ( $\text{\AA}^2$ ) for  $\text{Ba}_{10}(\text{PO}_4)_6(\text{Co}_{0.23}\text{O}_{0.98}\text{H}_y)_2$  (sample **2a**).  $R_{\text{wp}} = 0.017$ ,  $R_{\text{all}} = 0.014$ .

| Atom                            | Ba(1)      | Ba(2)       | P         | O(1)       | O(2)       | O(3)       | O(4)     | Co        |
|---------------------------------|------------|-------------|-----------|------------|------------|------------|----------|-----------|
| Site                            | 4f         | 6h          | 6h        | 6h         | 6h         | 12i        | 4e       | 2b        |
| SOF                             | 1          | 1           | 1         | 1          | 1          | 1          | 0.49(4)  | 0.235(17) |
| $x$                             | 1/3        | 0.24442(18) | 0.4024(7) | 0.3391(15) | 0.5748(15) | 0.3434(9)  | 0        | 0         |
| $y$                             | 2/3        | 0.98104(19) | 0.3699(8) | 0.4829(15) | 0.4553(15) | 0.2646(11) | 0        | 0         |
| $z$                             | -0.0006(4) | 1/4         | 1/4       | 1/4        | 1/4        | 0.0920(9)  | 0.189(7) | 0         |
| $U_{\text{eq}}, U_{\text{iso}}$ | 0.0122(7)  | 0.0151(11)  | 0.011(2)  | 0.013(4)   | 0.009(4)   | 0.020(3)   | 0.11(3)  | 0.060(16) |
| $U_{11}$                        | 0.0140(9)  | 0.0182(14)  |           |            |            |            |          | 0.09(2)   |
| $U_{22}$                        | 0.0140(9)  | 0.0074(13)  |           |            |            |            |          | 0.09(2)   |
| $U_{33}$                        | 0.0086(10) | 0.0156(11)  |           |            |            |            |          | 0.01(2)   |
| $U_{12}$                        | 0.0070(5)  | 0.0033(13)  |           |            |            |            |          | 0.044(11) |
| $U_{13}$                        | 0          | 0           |           |            |            |            |          | 0         |
| $U_{23}$                        | 0          | 0           |           |            |            |            |          | 0         |

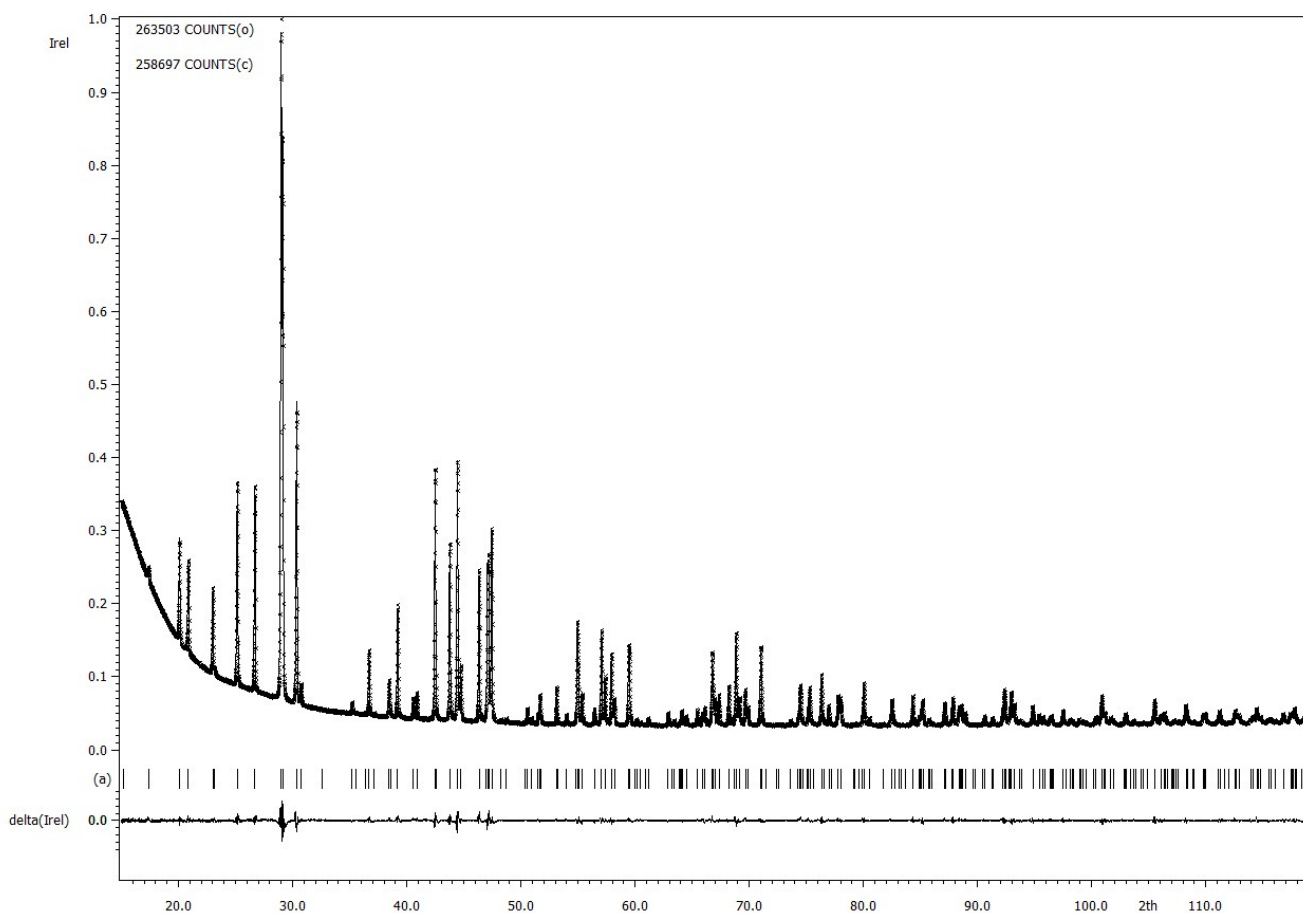

Figure S4. Powder X-ray diffraction pattern of **1**. Observed (crosses), calculated (solid line) and difference (solid line below) plots. Positions of Bragg reflections are shown as strokes underneath: (a) the main apatite-type phase  $\text{Ba}_{10}(\text{PO}_4)_6(\text{Co}_{0.05}\text{O}_{0.74}\text{H}_y)_2$ . Apatite-type phase lattice: Space group  $\text{P6}_3/\text{m}$ ,  $a = 10.1808(2) \text{ \AA}$ ,  $c = 7.7106(2) \text{ \AA}$ .

Table S6. Atomic parameters and thermal displacement parameters ( $\text{\AA}^2$ ) for  $\text{Ba}_{10}(\text{PO}_4)_6(\text{Co}_{0.05}\text{O}_{0.74}\text{H}_y)_2$  (sample **1**).  $R_{\text{wp}} = 0.020$ ,  $R_{\text{all}} = 0.019$ .

| Atom                            | Ba(1)      | Ba(2)       | P         | O(1)       | O(2)       | O(3)      | O(4)      | O(5)/Co      |
|---------------------------------|------------|-------------|-----------|------------|------------|-----------|-----------|--------------|
| Site                            | 4f         | 6h          | 6h        | 6h         | 6h         | 12i       | 4e        | 2b           |
| SOF                             | 1          | 1           | 1         | 1          | 1          | 1         | 0.236(16) | 0.27(2)/0.05 |
| $x$                             | 1/3        | 0.24032(16) | 0.4007(6) | 0.3401(15) | 0.5802(15) | 0.3453(8) | 0         | 0            |
| $y$                             | 2/3        | 0.98101(17) | 0.3690(7) | 0.4864(15) | 0.4627(15) | 0.2658(9) | 0         | 0            |
| $z$                             | -0.0009(3) | 1/4         | 1/4       | 1/4        | 1/4        | 0.0907(8) | 0.179(5)  | 0            |
| $U_{\text{eq}}, U_{\text{iso}}$ | 0.0141(6)  | 0.0160(10)  | 0.012(2)  | 0.027(5)   | 0.016(4)   | 0.022(3)  | 0.02      | 0.02         |
| $U_{11}$                        | 0.0141(8)  | 0.0198(13)  |           |            |            |           |           |              |
| $U_{22}$                        | 0.0141(8)  | 0.0096(12)  |           |            |            |           |           |              |
| $U_{33}$                        | 0.0142(9)  | 0.0154(9)   |           |            |            |           |           |              |
| $U_{12}$                        | 0.0071(4)  | 0.0049(11)  |           |            |            |           |           |              |
| $U_{13}$                        | 0          | 0           |           |            |            |           |           |              |
| $U_{23}$                        | 0          | 0           |           |            |            |           |           |              |

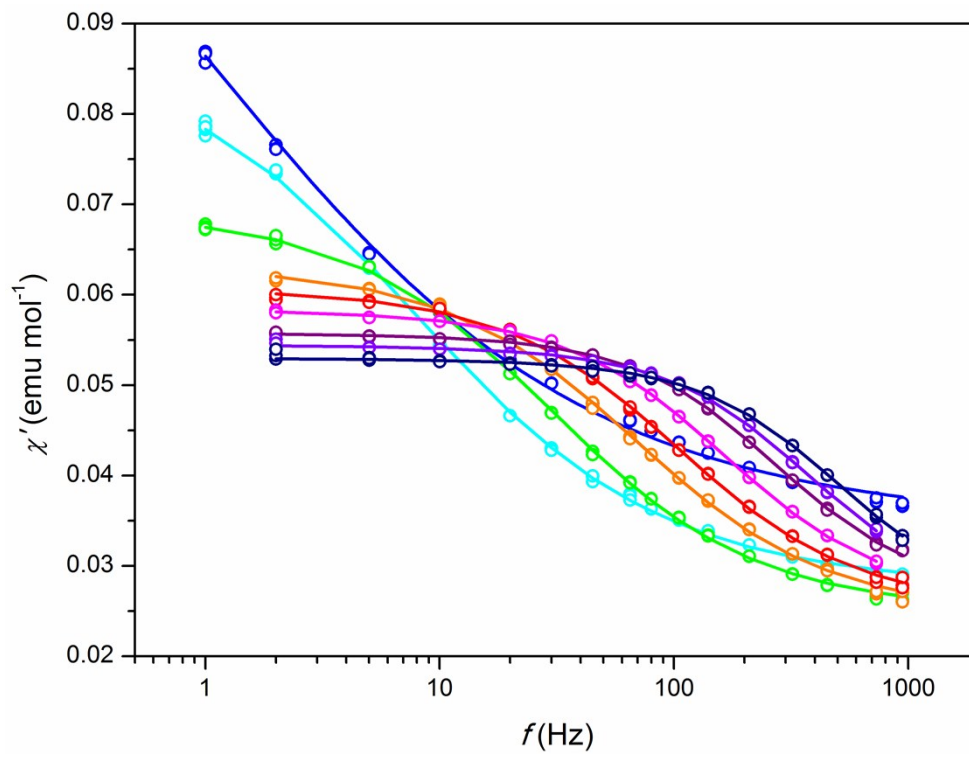

(a)

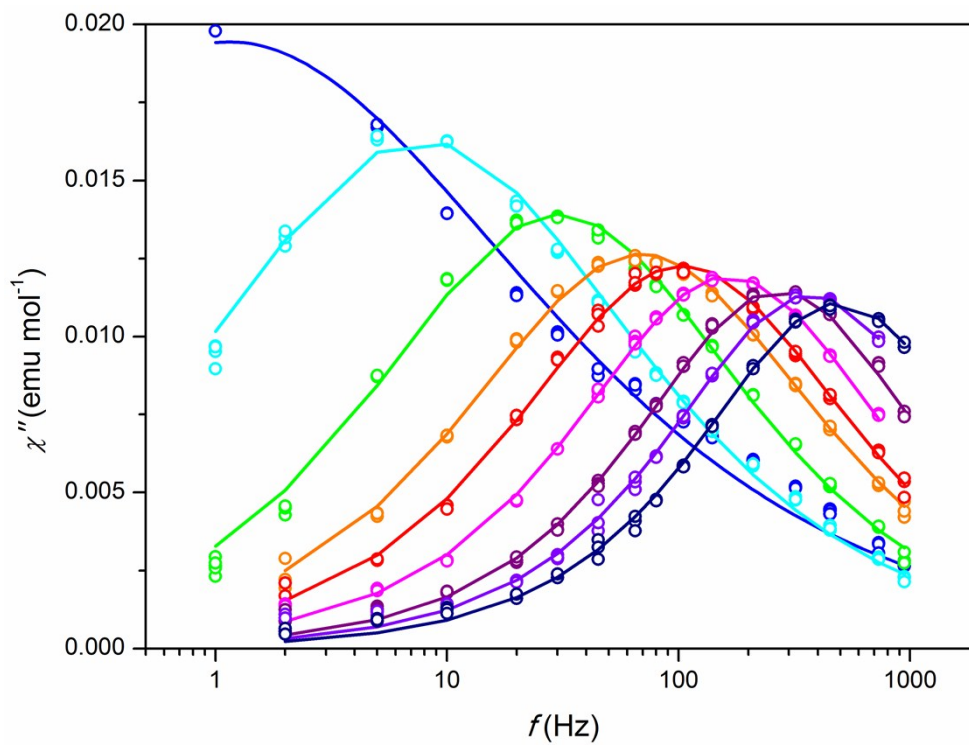

(b)

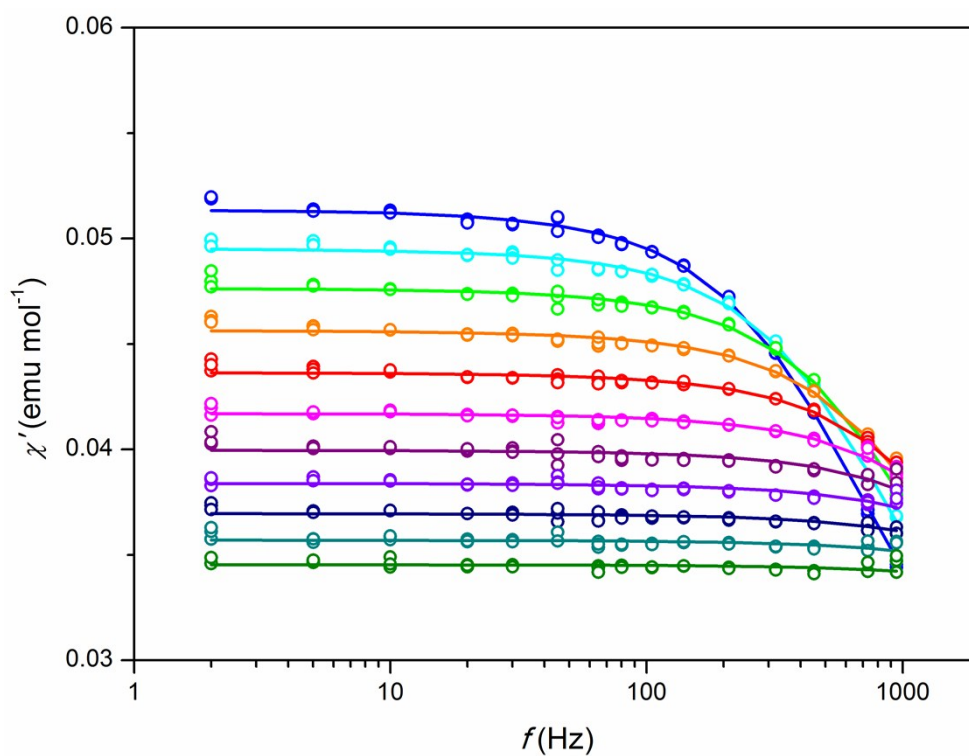

(c)

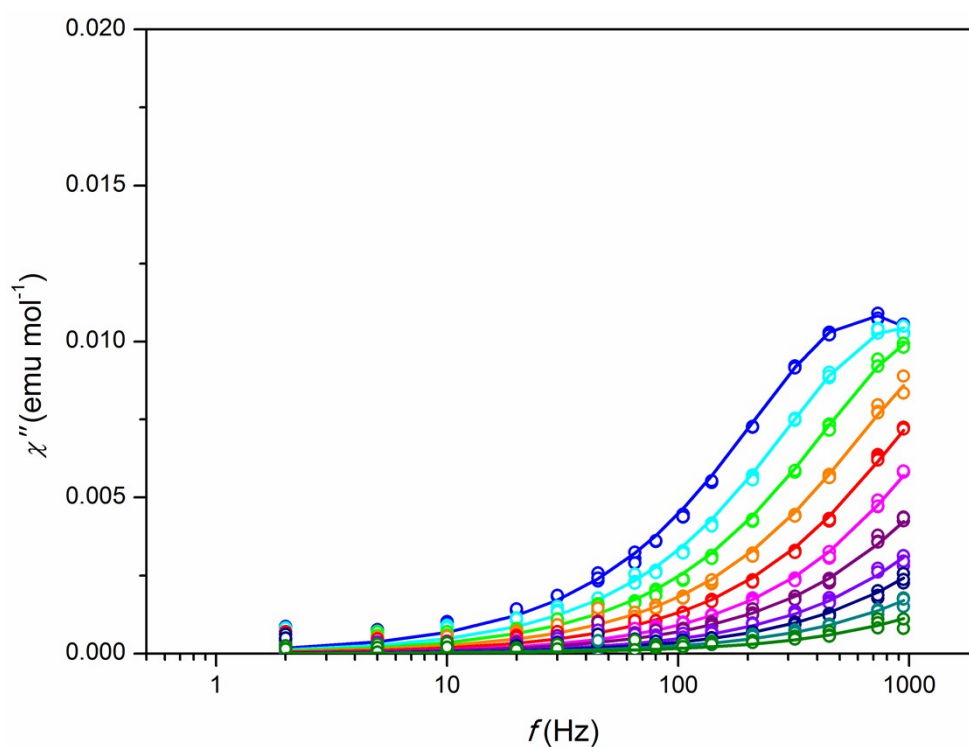

(d)

Figure S5. Frequency ( $f$ ) dependence of ac susceptibility per mol of Co under zero magnetic field for **3**. (a) and (c) – in-phase susceptibility  $\chi'$ , (b) and (d) – out-of-phase susceptibility  $\chi''$ . Symbols – experimental points, lines – fitting. The measurement temperature designation: (a) and (b) – blue, cyan, green, orange, red, magenta, purple, violet, navy – 10, 15, 20, 24, 26, 28, 30, 31, 32 K; (c) and (d) - blue, cyan, green, orange, red, magenta, purple, violet, navy, dark cyan, olive – from 33 to 43 K with a step of 1 K.



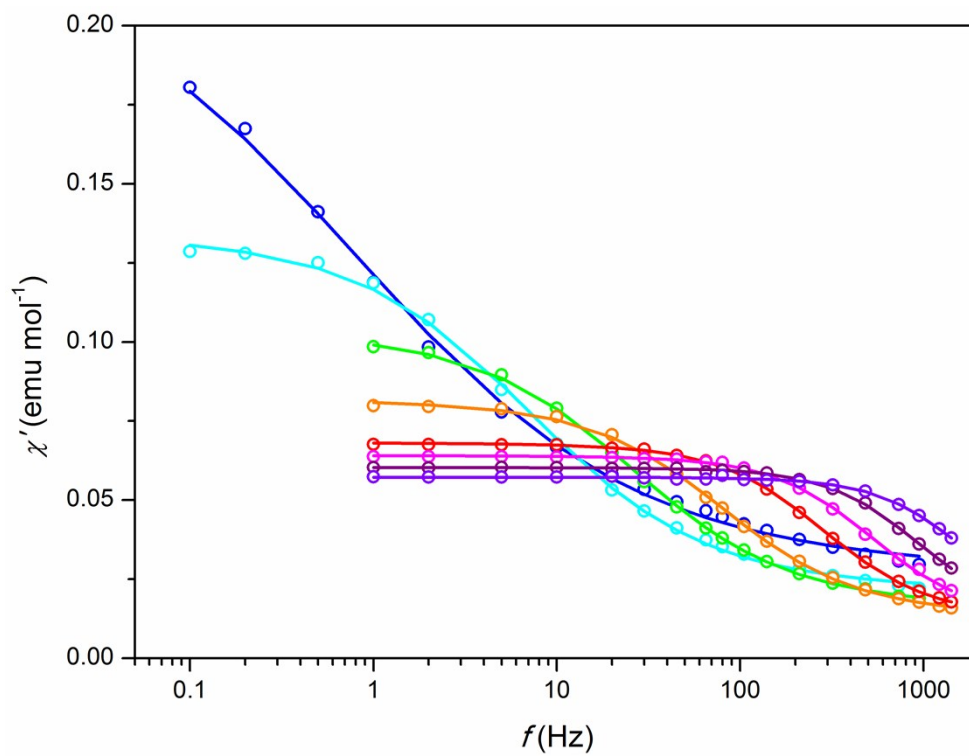

(a)

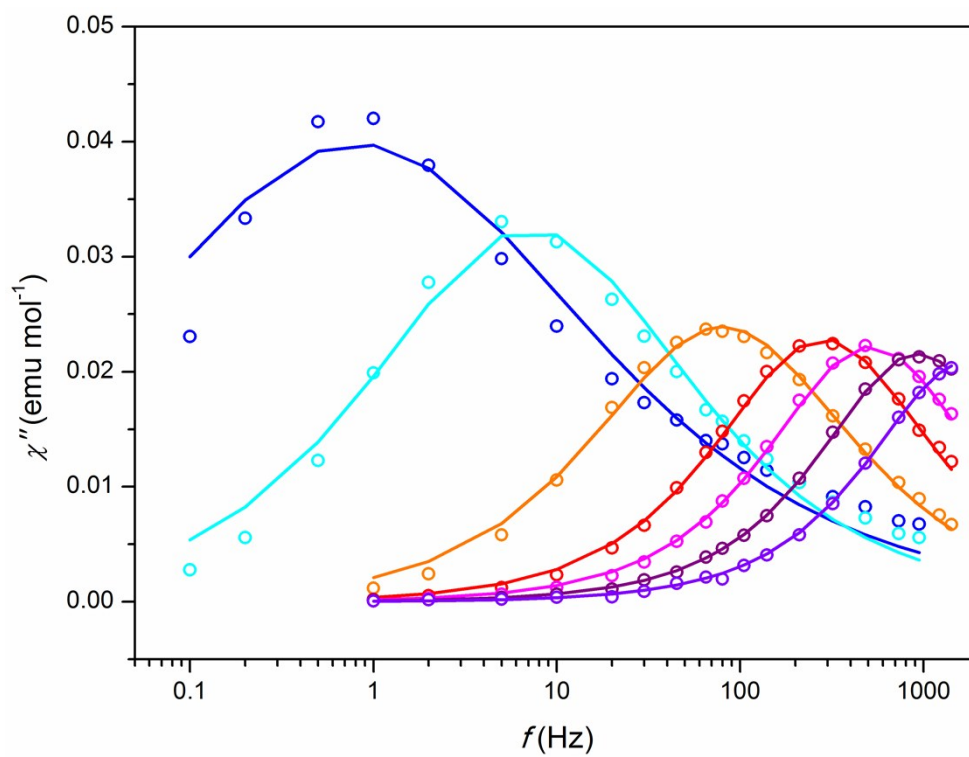

(b)

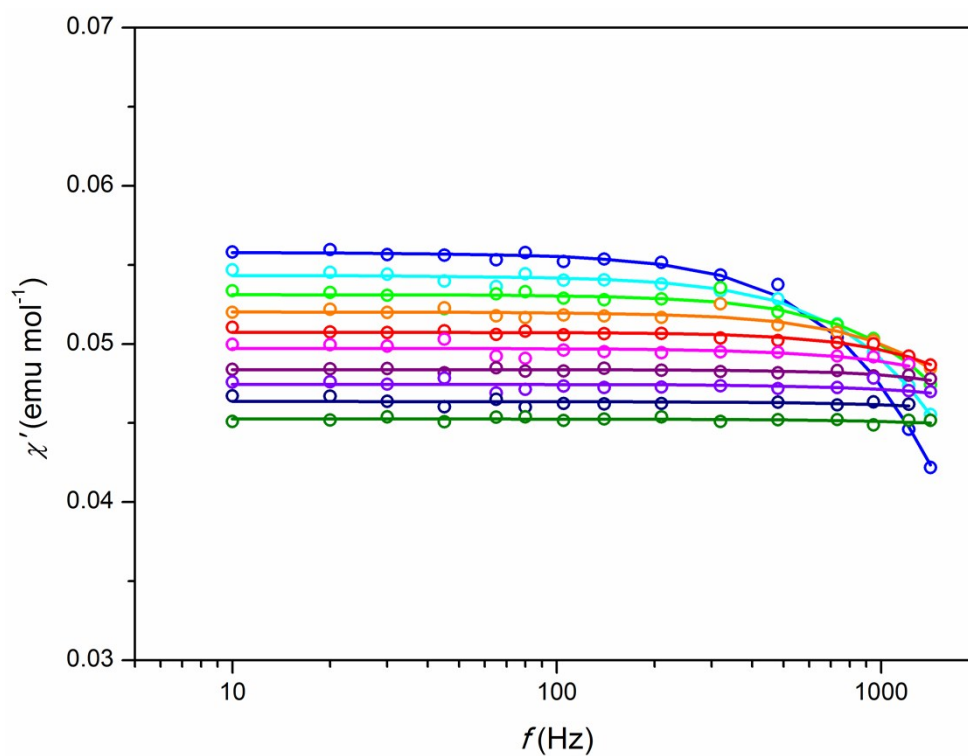

(c)

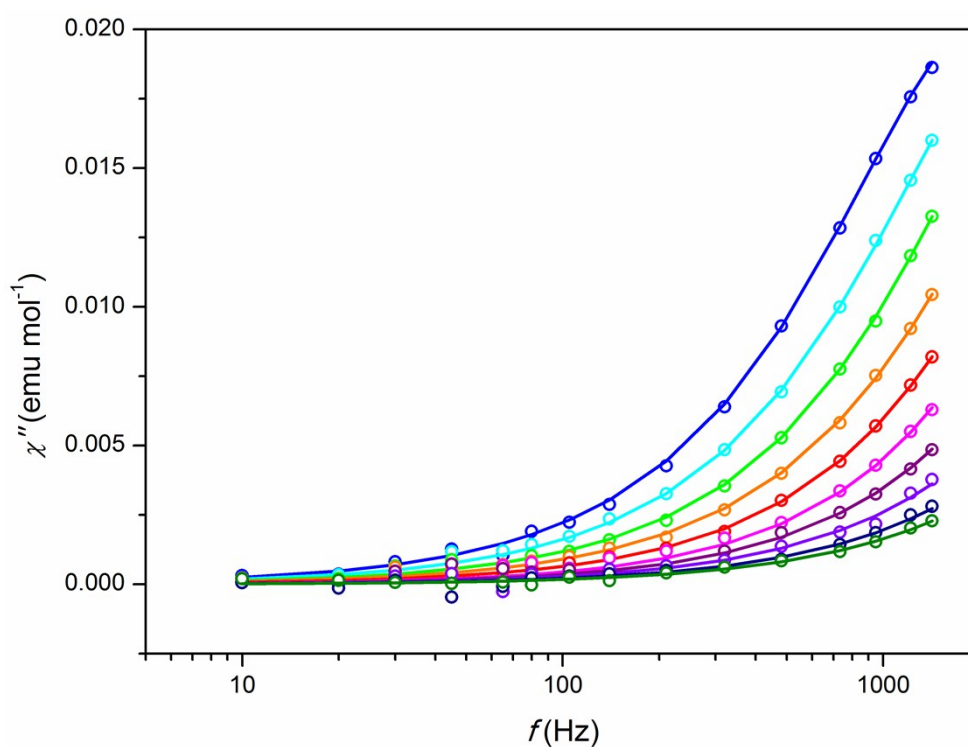

(d)

Figure S6. Frequency ( $f$ ) dependence of ac susceptibility per mol of Co under zero magnetic field for **2**. (a) and (c) – in-phase susceptibility  $\chi'$ , (b) and (d) – out-of-phase susceptibility  $\chi''$ . Symbols – experimental points, lines – fitting. The measurement temperature designation: (a) and (b) – blue, cyan, green, orange, red, magenta, purple, violet, – 10, 15, 20, 25, 30, 32, 34, 36; (c) and (d) - blue, cyan, green, orange, red, magenta, purple, violet, navy, olive – from 37 to 46 K with a step of 1 K.

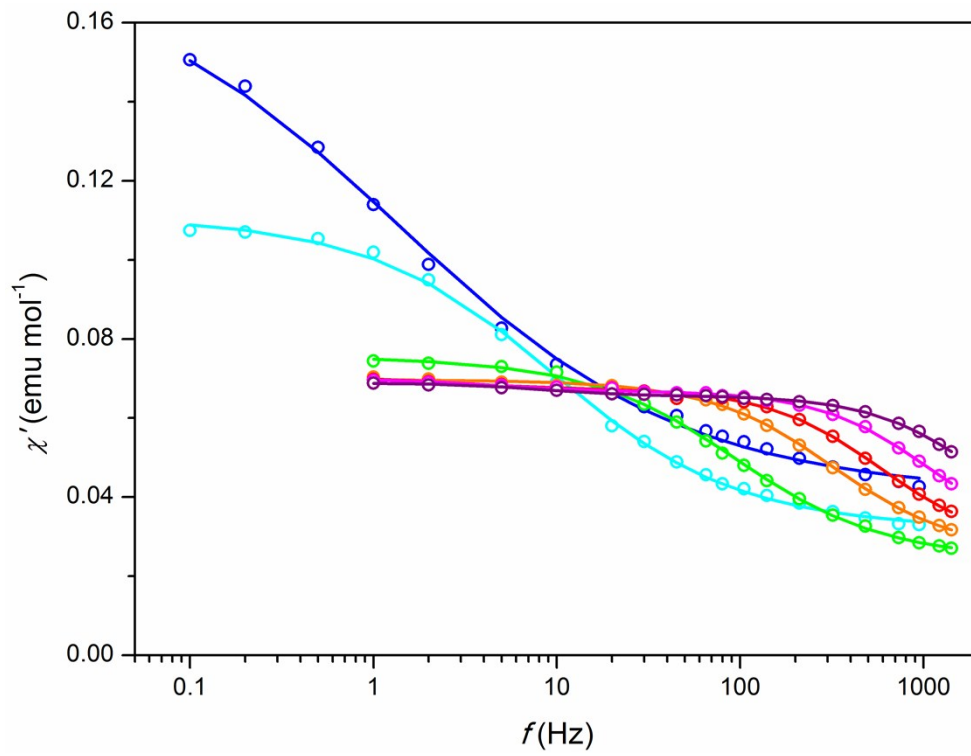

(a)

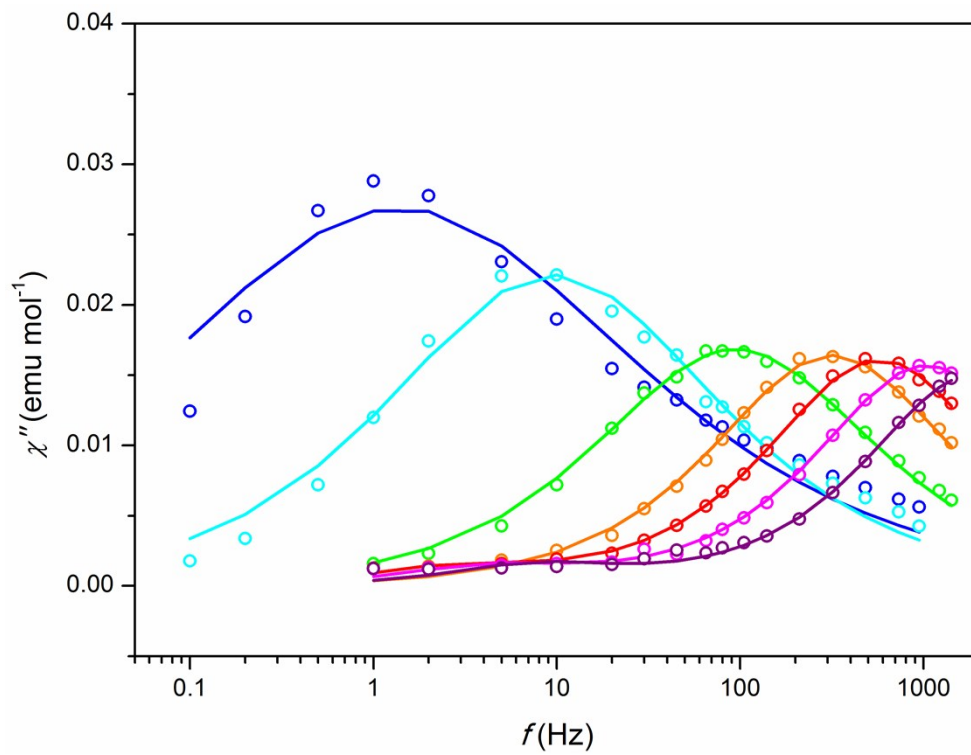

(b)

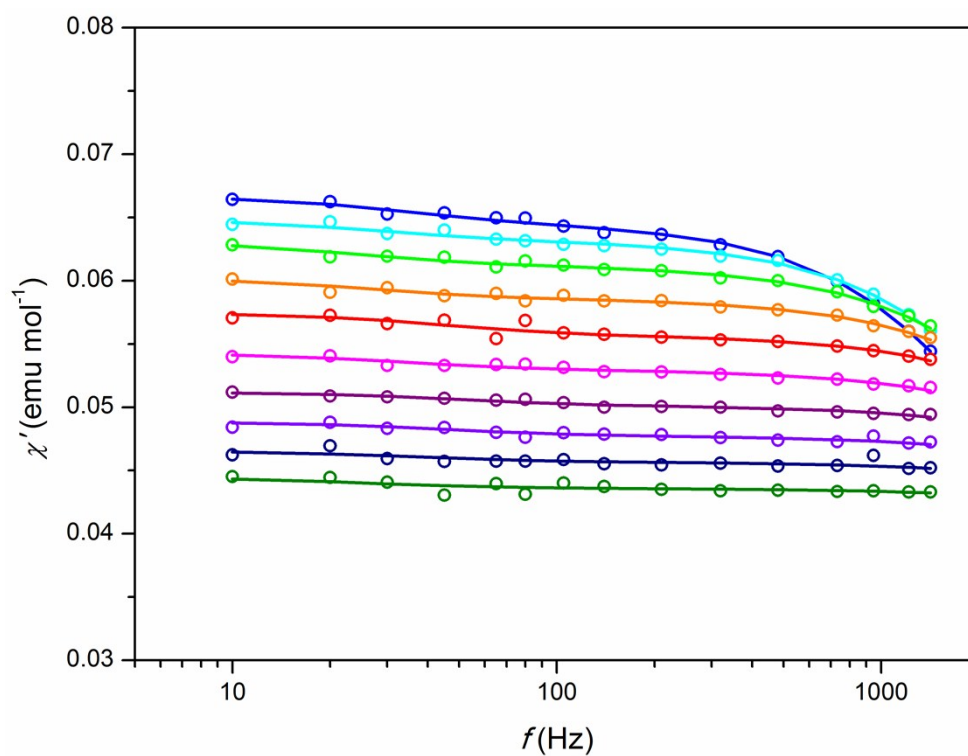

(c)

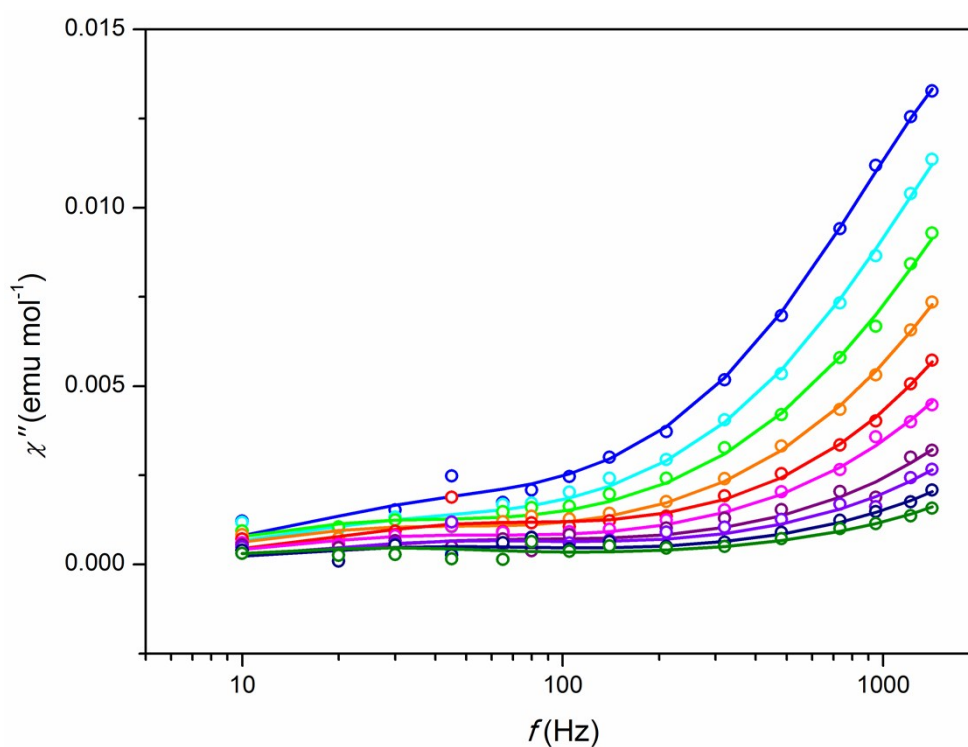

(d)

Figure S7. Frequency ( $f$ ) dependence of ac susceptibility per mol of Co under zero magnetic field for **2a**. (a) and (c) – in-phase susceptibility  $\chi'$ , (b) and (d) – out-of-phase susceptibility  $\chi''$ . Symbols – experimental points, lines – fitting. The measurement temperature designation: (a) and (b) – blue, cyan, green, orange, red, magenta, purple, – 10, 15, 25, 30, 32, 34, 36; (c) and (d) - blue, cyan, green, orange, red, magenta, purple, violet, navy, olive – from 37 to 46 K with a step of 1 K. The fitting included a small contribution (a few per cent) of a second relaxation process at a lower frequency.

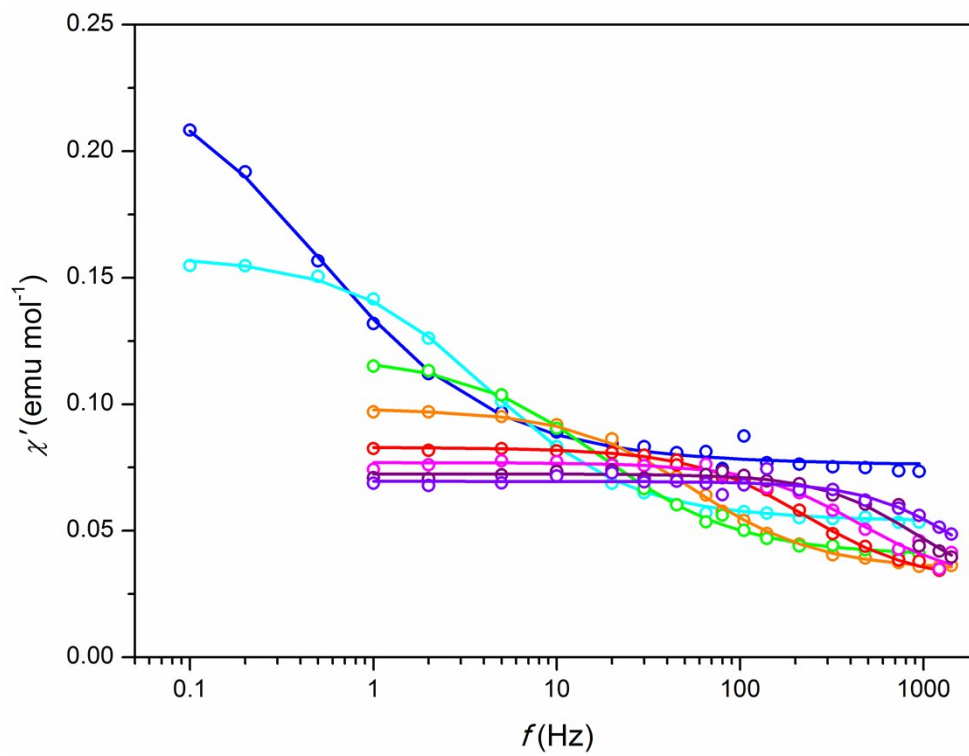

(a)

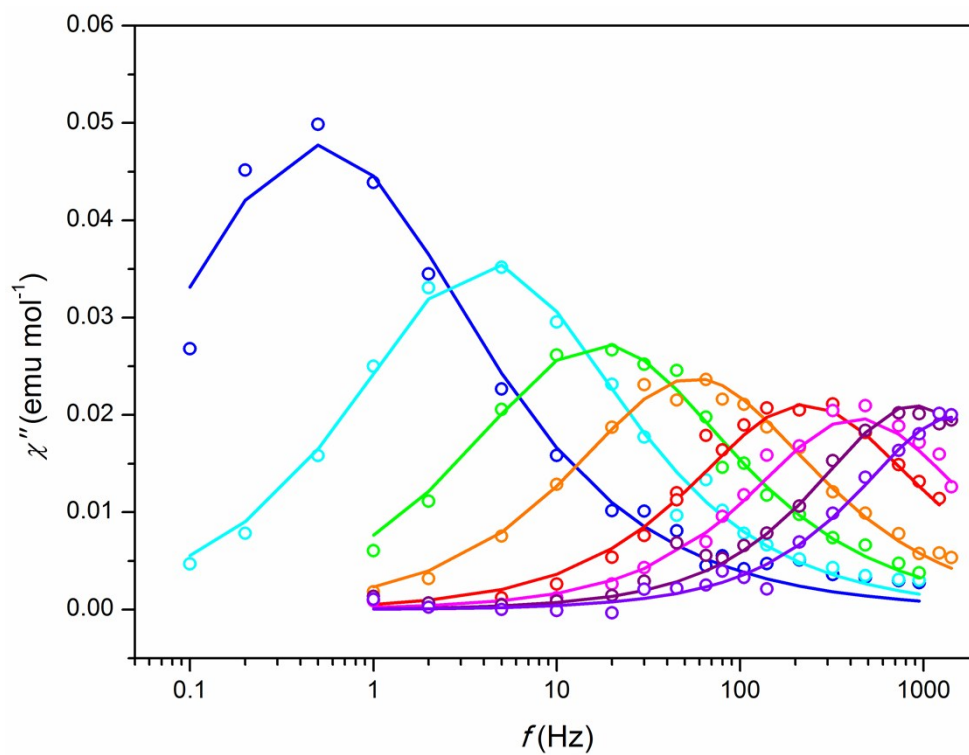

(b)

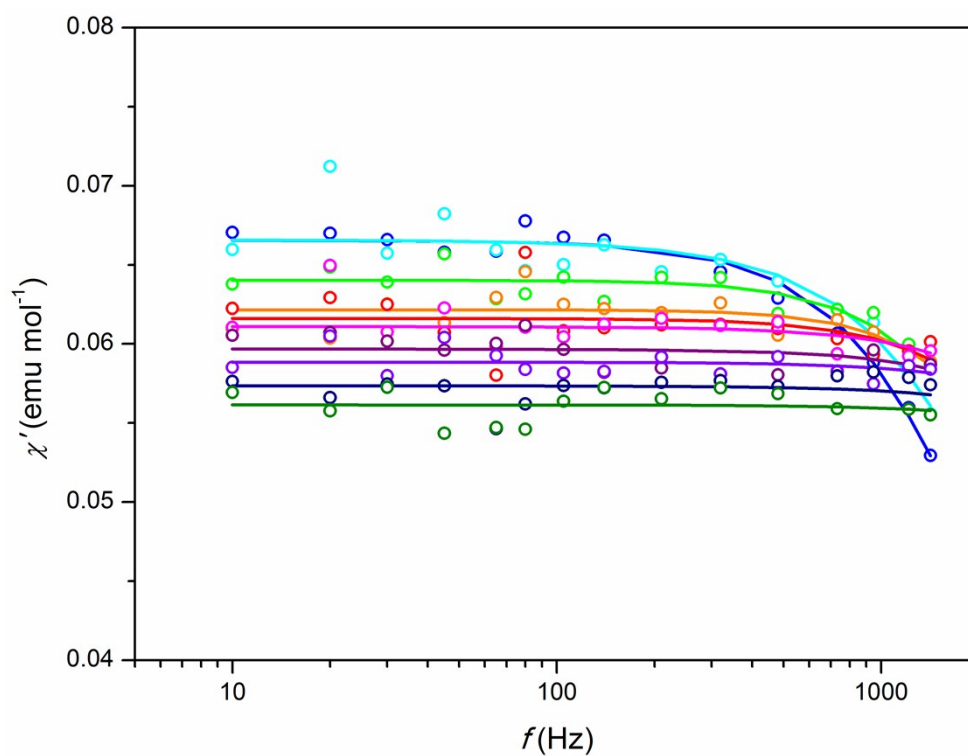

(c)

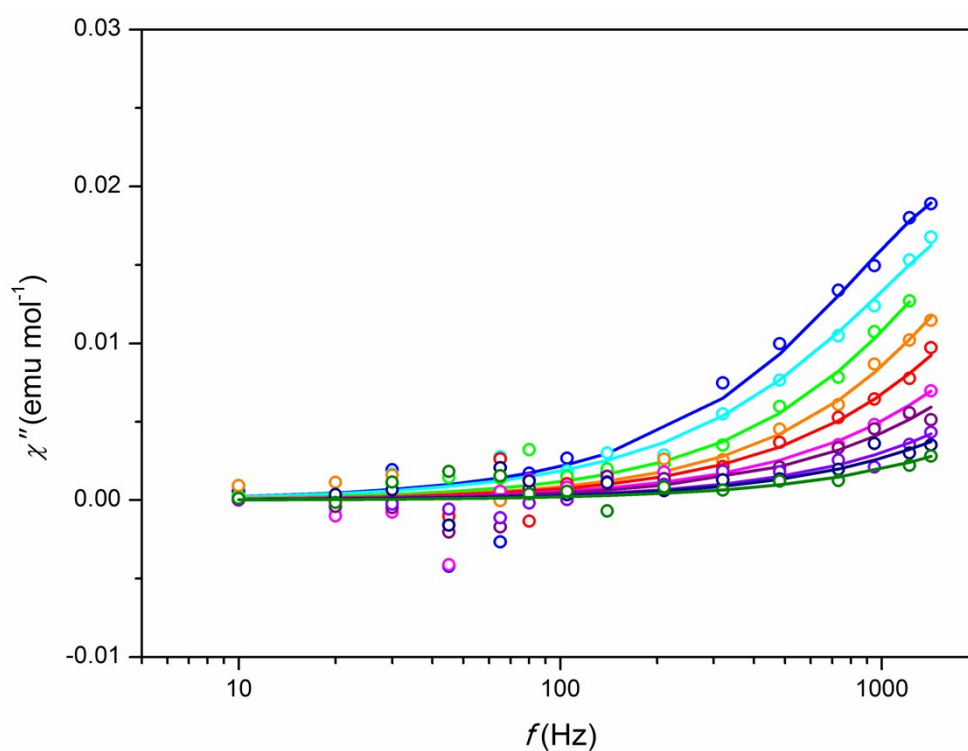

(d)

Figure S8. Frequency ( $f$ ) dependence of ac susceptibility per mol of Co under zero magnetic field for **1**. (a) and (c) – in-phase susceptibility  $\chi'$ , (b) and (d) – out-of-phase susceptibility  $\chi''$ . Symbols – experimental points, lines – fitting. The measurement temperature designation: (a) and (b) – blue, cyan, green, orange, red, magenta, purple, violet, – 10, 15, 20, 25, 30, 32, 34, 36; (c) and (d) - blue, cyan, green, orange, red, magenta, purple, violet, navy, olive – from 37 to 46 K with a step of 1 K.

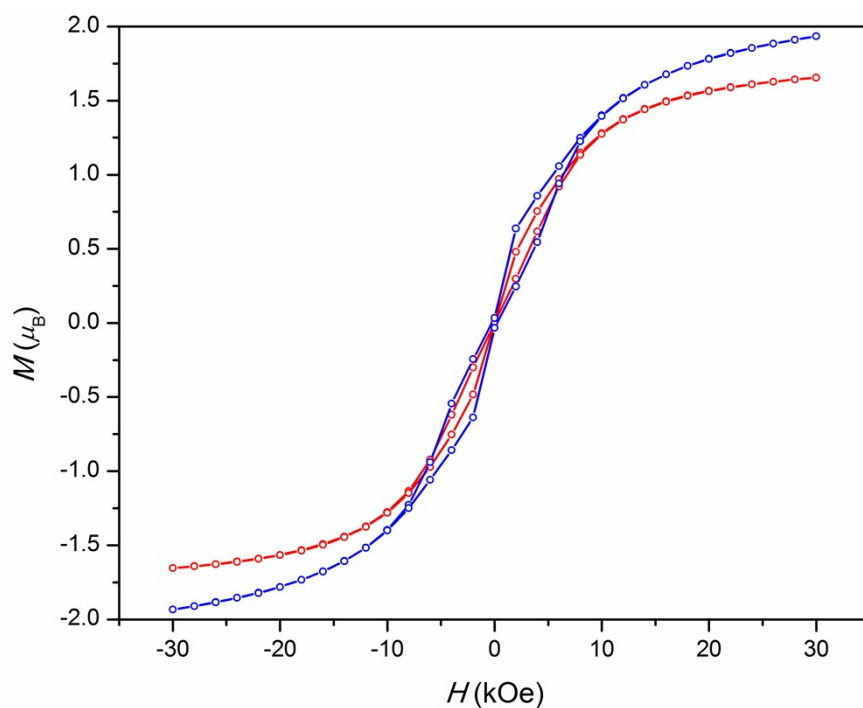

Figure S9. Magnetization  $M$  per 1 Co atom vs. magnetic field  $H$  at  $T = 1.8$  K measured with a field sweeping rate of ca.  $15$  Oe  $s^{-1}$ . Blue symbols – **1**, red symbols – **2**.

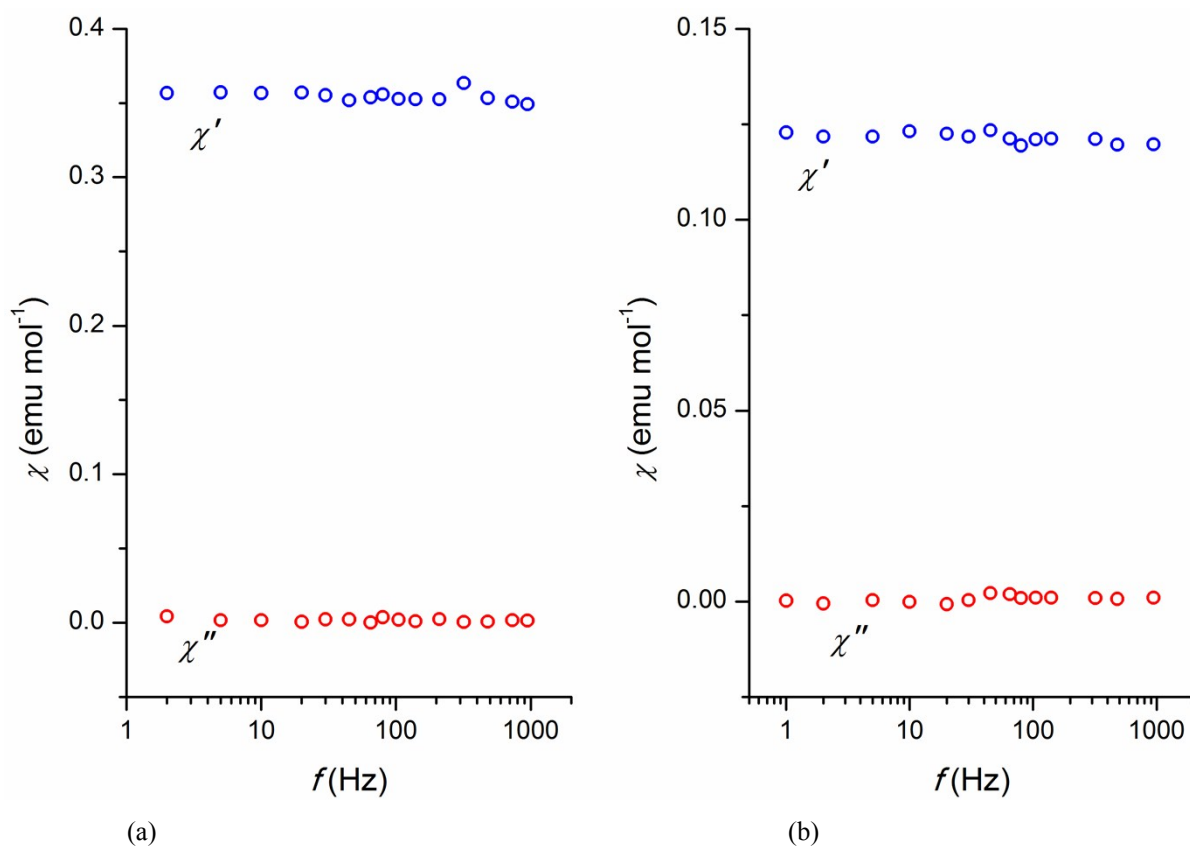

Figure S10. ac susceptibility of **4**. (a) at 5 K in a dc magnetic field of 4 kOe, (b) at 20 K in zero magnetic field.

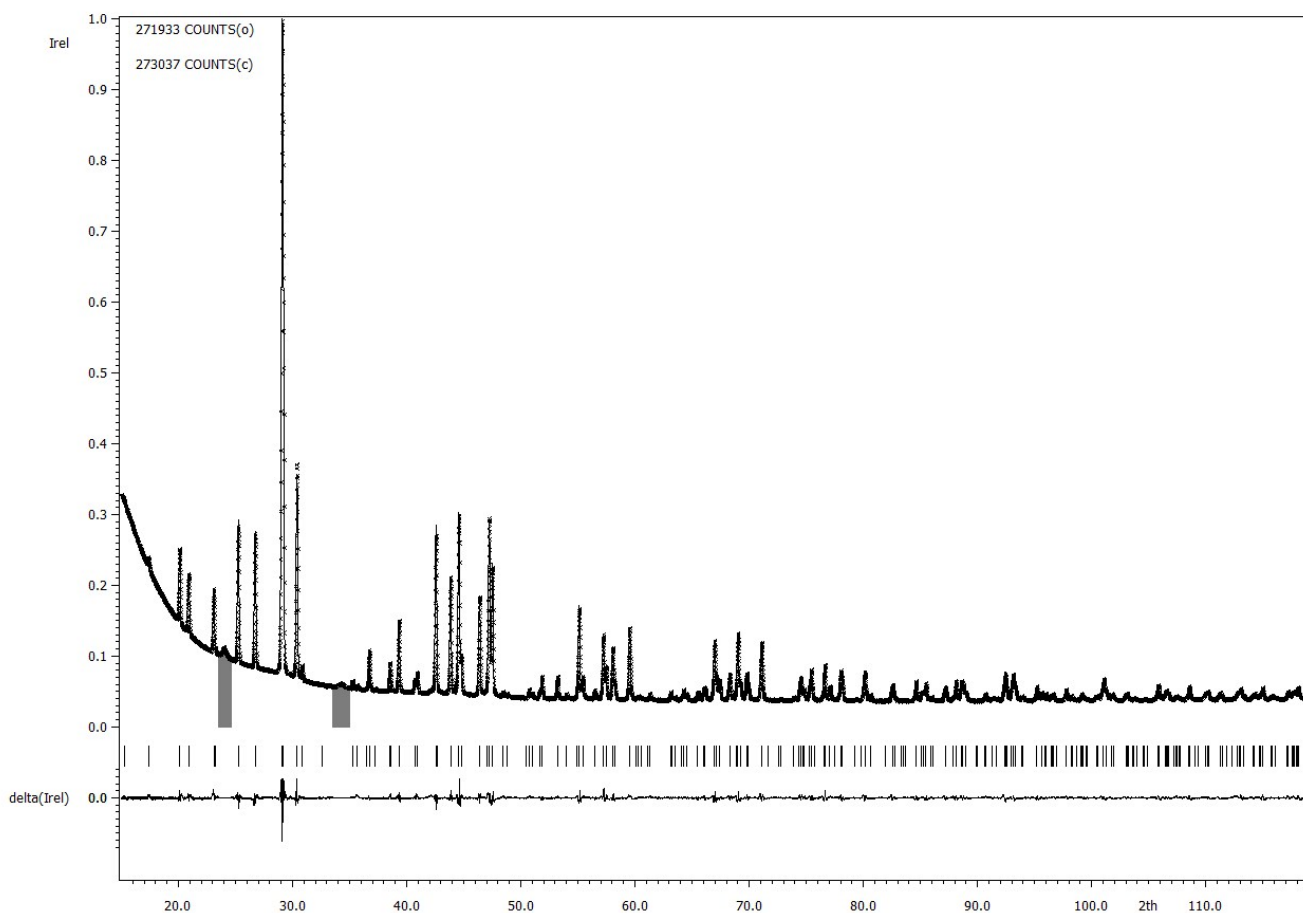

Figure S11. Powder X-ray diffraction pattern of **4**. Observed (crosses), calculated (solid line) and difference (solid line below) plots. Positions of Bragg reflections are shown as strokes underneath. The main apatite-type phase  $\text{Ba}_{10}(\text{PO}_4)_6(\text{OH})_2 \cdot 0.05\text{CO}_2\text{O}_3$ , space group  $P6_3/m$ ,  $a = 10.1772(2)$  Å,  $c = 7.6869(2)$  Å. Two extra peaks with intensity below 1.5% belong to an admixture of  $\text{BaCO}_3$ . The corresponding  $2\theta$  intervals have been excluded (shaded areas).

Table S7. Atomic parameters and thermal displacement parameters ( $\text{Å}^2$ ) for  $\text{Ba}_{10}(\text{PO}_4)_6(\text{OH})_2 \cdot 0.05\text{CO}_2\text{O}_3$  (sample **4**).  $R_{\text{wp}} = 0.020$ ,  $R_{\text{all}} = 0.019$ .

| Atom                            | Ba(1)      | Ba(2)      | P         | O(1)       | O(2)       | O(3)       | O(4)      |
|---------------------------------|------------|------------|-----------|------------|------------|------------|-----------|
| Site                            | 4f         | 6h         | 6h        | 6h         | 6h         | 12i        | 4e        |
| SOF                             | 1          | 1          | 1         | 1          | 1          | 1          | 0.5       |
| $x$                             | 1/3        | 0.2400(2)  | 0.4014(8) | 0.3330(18) | 0.5752(18) | 0.3472(11) | 0         |
| $y$                             | 2/3        | 0.9820(3)  | 0.3681(9) | 0.4807(19) | 0.460(2)   | 0.2684(11) | 0         |
| $z$                             | -0.0011(5) | 1/4        | 1/4       | 1/4        | 1/4        | 0.0881(12) | 0.111(3)  |
| $U_{\text{eq}}, U_{\text{iso}}$ | 0.0135(8)  | 0.0150(14) | 0.005(2)  | 0.012(6)   | 0.010(5)   | 0.017(4)   | 0.043(13) |
| $U_{11}$                        | 0.0140(11) | 0.0132(18) |           |            |            |            |           |
| $U_{22}$                        | 0.0140(11) | 0.0124(17) |           |            |            |            |           |
| $U_{33}$                        | 0.0127(13) | 0.0155(12) |           |            |            |            |           |
| $U_{12}$                        | 0.0070(5)  | 0.0035(17) |           |            |            |            |           |
| $U_{13}$                        | 0          | 0          |           |            |            |            |           |
| $U_{23}$                        | 0          | 0          |           |            |            |            |           |



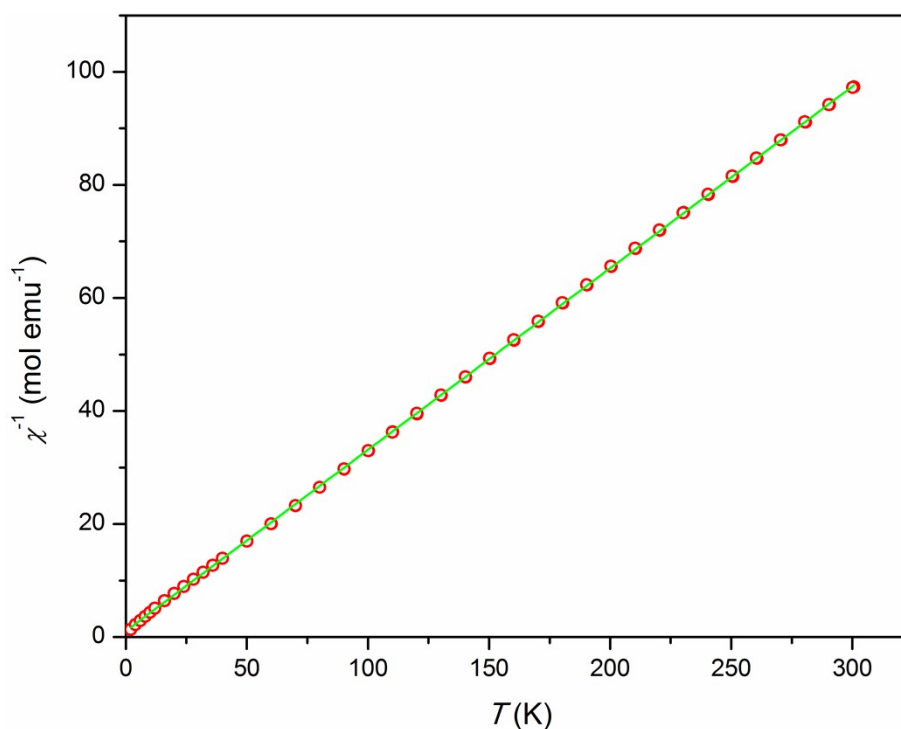

Figure S12. Inverted dc-susceptibility  $\chi^{-1}$  per 1 mol of Co vs. temperature  $T$  in a field of 5 kOe for **4**. Symbols – experimental points. Line – fitting with eq.  $\chi = C/(T - \theta) + \chi_{\text{TIP}}$ ,  $C = 3.119(8)$  emu K mol $^{-1}$ ,  $\theta = -3.2(1)$  K,  $\chi_{\text{TIP}} = -2(3) \cdot 10^{-5}$  emu mol $^{-1}$ ,  $R^2 = 0.99997$ ;  $\mu_{\text{eff}} = 4.99(1)$   $\mu_{\text{B}}$ .

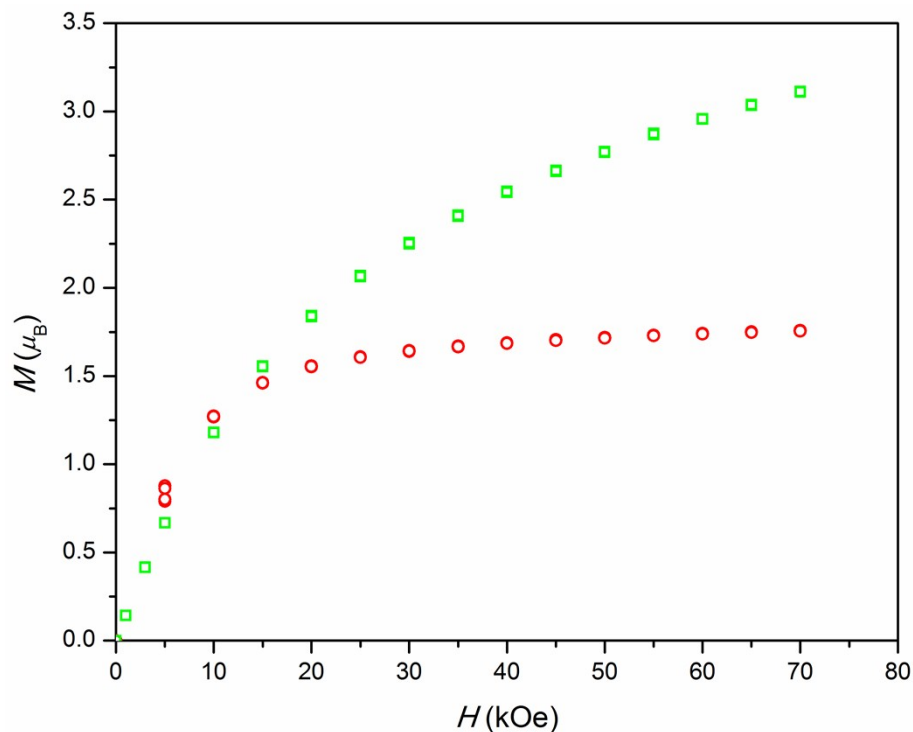

Figure S13. Magnetization ( $M$ ) per 1 atom of Co vs. magnetic field ( $H$ ) at 1.8 K. Circles – **2**, Squares – **4**. Measured points are for field up from 0 to 70 kOe and down to 0 kOe. Two points were measured at each field with time interval of 50 s. **4** shows no hysteresis and relaxation. **2** shows hysteresis only at  $H = 0.5$  kOe, the second point for fields both up and down is shifted due to the magnetization relaxation.

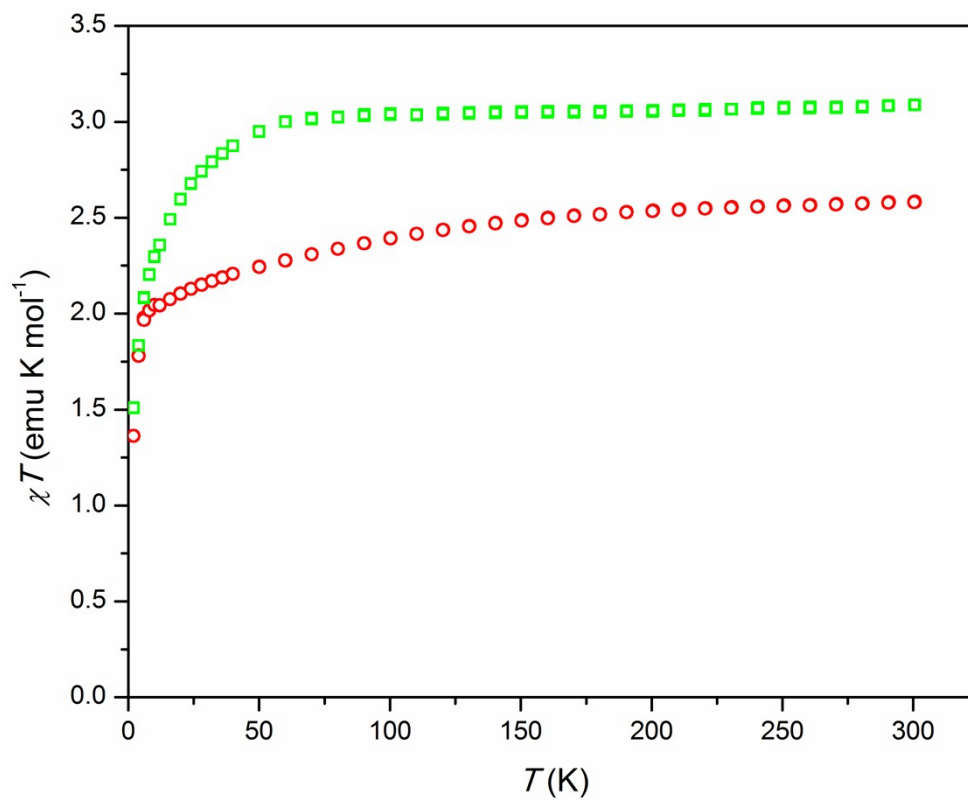

Figure S14. Product  $\chi T$  per 1 mol of Co vs. temperature ( $T$ ). Circles – 2. Squares – 4.

## Modeling electronic structure and magnetic susceptibility using program CONDON.

Input parameters.

7 d-electrons, 120 basis electron states. Racah parameters (Co<sup>2+</sup>),  $B = 1115 \text{ cm}^{-1}$ ,  $C = 4366 \text{ cm}^{-1}$ . Spin-orbital coupling constant  $\zeta = 533 \text{ cm}^{-1}$ , orbital reduction factor 0.84 (isotropic). Crystal field parameters (Wybourne notation),  $B_{20} = 24000 \text{ cm}^{-1}$ ,  $B_{40} = 12000 \text{ cm}^{-1}$ ,  $B_{22} = 3600 \text{ cm}^{-1}$ ,  $B_{42} = 1800 \text{ cm}^{-1}$ ,  $B_{44} = 1700 \text{ cm}^{-1}$ .

Output parameters.

Table S8. Energies of first 10 energy doublets and their (negative) magnetic moments under a field of 10 kOe for spins antiparallel (upper row) and parallel (lower row) to the magnetic field.

| Energy in zero field (cm <sup>-1</sup> ) | $\mu_z (\mu_B)$ | $\mu_x (\mu_B)$ | $\mu_y (\mu_B)$ |
|------------------------------------------|-----------------|-----------------|-----------------|
| 0.0000E+00                               | -0.4994E+01     | -0.1606E+00     | -0.1375E+00     |
|                                          | 0.4992E+01      | 0.1392E+00      | 0.1231E+00      |
| 0.3351E+03                               | -0.2089E+01     | -0.1804E+01     | -0.1891E+01     |
|                                          | 0.2082E+01      | 0.1820E+01      | 0.1903E+01      |
| 0.1305E+04                               | -0.5239E-01     | -0.1480E+01     | -0.2138E+01     |
|                                          | 0.5998E-01      | 0.1463E+01      | 0.2124E+01      |
| 0.1628E+04                               | -0.1115E+01     | -0.2453E+00     | -0.2453E+00     |
|                                          | 0.1117E+01      | 0.2635E+00      | 0.2602E+00      |
| 0.2560E+04                               | -0.2427E+00     | -0.3589E+00     | -0.3360E+01     |
|                                          | 0.2877E-01      | 0.5953E-01      | 0.3356E+01      |
| 0.2583E+04                               | -0.2029E+01     | -0.1756E+01     | -0.1099E+01     |
|                                          | 0.2243E+01      | 0.2054E+01      | 0.1101E+01      |
| 0.5398E+04                               | -0.3797E+01     | -0.3705E-01     | -0.3886E-01     |
|                                          | 0.3796E+01      | 0.1297E-01      | 0.1085E-01      |
| 0.5588E+04                               | -0.1519E+01     | -0.1703E+01     | -0.1587E+01     |
|                                          | 0.1516E+01      | 0.1719E+01      | 0.1611E+01      |
| 0.5993E+04                               | -0.2433E+00     | -0.4388E+00     | -0.2744E+01     |
|                                          | 0.2423E+00      | 0.4269E+00      | 0.2738E+01      |
| 0.6201E+04                               | -0.1865E+01     | -0.8761E+00     | -0.8399E+00     |
|                                          | 0.1869E+01      | 0.8986E+00      | 0.8494E+00      |

## Fitting of $\Delta\chi$ (see Fig. 4 insert and the main text).

Model of a Heisenberg dimer. 
$$\Delta\chi = \frac{FNg^2\mu_B^2}{6k_B T} \cdot \frac{6 \exp(2J/k_B T) + 30 \exp(6J/k_B T) + 84 \exp(12J/k_B T)}{1 + 3 \exp(2J/k_B T) + 5 \exp(6J/k_B T) + 7 \exp(12J/k_B T)} + \chi_{TIP}.$$

$F = 0.140(3)$ ,  $g = 2$  (fixed),  $J = -25.1(3) \text{ cm}^{-1}$ ,  $\chi_{TIP} = 0.00021(2) \text{ emu mol}^{-1}$ ,  $R^2 = 0.982$ .  $F$  is a fraction of Co ions left after the exclusion of the FR fraction (90%). Then a fraction of all Co ions present in the sample, which is found in the proposed dimer, is  $F*90\% = 13\%$ .

## References

- 1 M. Drakopoulos, Th. Connolley, C. Reinhard, R. Atwood, O. Magdysyuk, N. Vo, M. Hart, L. Connor, B. Humphreys, G. Howell, S. Davies, T. Hill, G. Wilkin, U. Pedersen, A. Foster, N. De Maio, M. Basham, F. Yuan, K. Wanelik. I12: the Joint Engineering, Environment and Processing (JEEP) beamline at Diamond Light Source. *J. Synchrotron Rad.* 2015, **22**, 828-838.
- 2 J. Filik, A.W. Ashton, P.C.Y. Chang, P.A. Chater, S.J. Day, M. Drakopoulos, M. Gerring, M.L. Hart, O.V. Magdysyuk, S. Michalik, A. Smith, C.C. Tang, N. J. Terrill, M.T. Wharmby and H. Wilhelm. Calibration and Processing of Powder-Diffraction Data in DAWN. *J. Appl. Cryst.* 2016 (submitted).
- 3 M. Basham, J. Filik, M.T. Wharmby, P.C.Y. Chang, B.E. Kassaby, M. Gerring, J. Aishima, K. Levik, B.C.A. Pulford, I. Sikharulidze, D. Sneddon, M. Webber, S.S. Dhesi, F. Maccherozzi, O. Svensson, S. Brockhauser, G. Naray and A.W. Ashton. Data Analysis WorkbeNch (DAWN). *J. Synchrotron Rad.* 2015, **22**, 853–858.
- 4 V. Petříček, M. Dušek, L. Palatinus. Crystallographic Computing System JANA2006: General Features. *Z. Kristallogr.-Cryst. Mater.* 2014, **229**, 345-352.
- 5 S. M. J. Aubin, Z. Sun, L. Pardi, J. Krzystek, K. Folting, L.-C. Brunel, A. L. Rheingold, G. Christou and D. N. Hendrickson. Reduced Anionic Mn<sub>12</sub> Molecules with Half-Integer Ground States as Single-Molecule Magnets. *Inorg. Chem.* 1999, **38**, 5329-5340.
